# Supplementary material
Source: PubMed Central journal article supplement (PMC8994247)
Supplement: 10020_2022_465_MOESM1_ESM.pdf [file 10020_2022_465_MOESM1_ESM.pdf]

## Supplementary material

### Endothelial progenitor cells protein changes in response to the serum factors of asymptomatic COVID-19 patients

**Supplementary tables S1. Serology test for antibodies detection results for PCR+ samples.** The table includes (from left to right): Number of serum sample, PCR test for virus detection results, ELISA test for IgM detection results and ELISA test for IgG detection results

| Serum sample (n°) | PCR | IgM | IgG |
|-------------------|-----|-----|-----|
| 066               | +   | -   | -   |
| 081               | +   | -   | -   |
| 090               | +   | -   | -   |
| 111               | +   | -   | -   |
| 163               | +   | -   | +   |
| 169               | +   | -   | -   |
| 195               | +   | -   | -   |
| 299               | +   | -   | -   |

**Supplementary table S2. Quantitative analysis of proteins differentially expressed in serum samples (vs Neg).** The table includes (from left to right): Protein IDs (Uniprot accession number), protein description, PCR+/Neg ratio, PCR+/Neg p-value, IgG+/Neg ratio and IgG+/Neg p-value. Over-expressed values are indicated in red (considering up-regulated ratio > 1.5) and under-expressed values in green (down-regulated ratio < 0.6). The table shows the significant values for at least one of the comparisons. (considering P-value < 0.05 as differentially significant)

| Protein IDs | Protein names                                | Ratio PCRvsNeg | p-value | Ratio IgGvsNeg | p-value |
|-------------|----------------------------------------------|----------------|---------|----------------|---------|
| A0A0G2JL54  | C4a anaphylatoxin                            | 1.728          | 0.002   | 1.545          | 0.001   |
| C9JF17      | Apolipoprotein D                             | 10.883         | 0.000   | 3.232          | 0.030   |
| P01743      | Ig heavy chain V-I region HG3                | 3.351          | 0.008   | 3.172          | 0.001   |
| P01764      | Ig heavy chain V-III region 23               | 1.616          | 0.001   | 1.700          | 0.000   |
| P20742      | Pregnancy zone protein                       | 4.099          | 0.091   | 3.049          | 0.018   |
| P01766      | Ig heavy chain V-III region BRO              | 3.289          | 0.008   | 1.918          | 0.063   |
| P11597      | Cholesteryl ester transfer protein           | 4.283          | 0.004   | 1.728          | 0.148   |
| A0A0A0MS15  | Immunoglobulin heavy variable 3-49           | 1.525          | 0.022   | 1.301          | 0.043   |
| P01009      | Alpha-1-antitrypsin                          | 1.599          | 0.000   | 1.394          | 0.000   |
| A0A0C4DH33  | Immunoglobulin heavy variable 1-24           | 1.064          | 0.801   | 1.807          | 0.001   |
| A0A0C4DH41  | Ig heavy chain V-II region NEWM              | 1.149          | 0.727   | 1.590          | 0.025   |
| A0A5H1ZRQ7  | Ig lambda-7 chain C region                   | 1.324          | 0.422   | 1.541          | 0.041   |
| P02766      | Transthyretin                                | 1.238          | 0.020   | 1.159          | 0.009   |
| P01019      | Angiotensinogen                              | 1.448          | 0.018   | 1.301          | 0.021   |
| P01031      | Complement C5                                | 1.168          | 0.002   | 1.062          | 0.033   |
| P02671      | Fibrinogen alpha chain                       | 1.396          | 0.020   | 1.490          | 0.000   |
| P02763      | Alpha-1-acid glycoprotein 1                  | 1.261          | 0.023   | 1.182          | 0.009   |
| P04217      | Alpha-1B-glycoprotein                        | 1.107          | 0.049   | 1.079          | 0.004   |
| P22352      | Glutathione peroxidase 3                     | 1.052          | 0.519   | 1.104          | 0.029   |
| A0A0C4DH31  | Immunoglobulin heavy variable 1-18 precursor | 1.083          | 0.496   | 1.193          | 0.011   |

|            |                                                      |       |       |       |       |
|------------|------------------------------------------------------|-------|-------|-------|-------|
| A0A0G2JMB2 | Immunoglobulin heavy constant alpha 2                | 0.946 | 0.776 | 1.297 | 0.037 |
| B7ZKJ8     | Inter-alpha-trypsin inhibitor heavy chain H4         | 0.959 | 0.436 | 1.066 | 0.043 |
| Q9UK55     | Protein Z-dependent protease inhibitor               | 1.263 | 0.124 | 1.248 | 0.008 |
| P00450     | Ceruloplasmin                                        | 1.078 | 0.446 | 1.135 | 0.014 |
| P00740     | Coagulation factor IX                                | 0.944 | 0.737 | 1.150 | 0.044 |
| P00742     | Coagulation factor X                                 | 0.972 | 0.666 | 1.091 | 0.021 |
| P01011     | Alpha-1-antichymotrypsin                             | 1.047 | 0.370 | 1.062 | 0.047 |
| P01742     | Ig heavy chain V-I region EU                         | 0.953 | 0.776 | 1.314 | 0.047 |
| P02750     | Leucine-rich alpha-2-glycoprotein                    | 1.111 | 0.350 | 1.183 | 0.013 |
| P02753     | Retinol-binding protein 4                            | 1.193 | 0.111 | 1.150 | 0.023 |
| P02765     | Alpha-2-HS-glycoprotein                              | 1.112 | 0.278 | 1.213 | 0.003 |
| P02775     | Platelet basic protein                               | 0.949 | 0.602 | 1.103 | 0.046 |
| P02776     | Platelet factor 4                                    | 0.929 | 0.489 | 1.137 | 0.022 |
| P02790     | Hemopexin                                            | 1.064 | 0.138 | 1.098 | 0.001 |
| P04196     | Histidine-rich glycoprotein                          | 1.135 | 0.198 | 1.134 | 0.015 |
| P05543     | Thyroxine-binding globulin                           | 1.031 | 0.782 | 1.128 | 0.030 |
| P05546     | Heparin cofactor 2                                   | 0.997 | 0.969 | 1.153 | 0.004 |
| P07996     | Thrombospondin-1                                     | 1.289 | 0.238 | 1.476 | 0.001 |
| P08185     | Corticosteroid-binding globulin                      | 1.111 | 0.173 | 1.108 | 0.014 |
| P15169     | Carboxypeptidase N catalytic chain                   | 1.130 | 0.241 | 1.147 | 0.011 |
| P18428     | Lipopolysaccharide-binding protein                   | 1.261 | 0.088 | 1.331 | 0.004 |
| P19652     | Alpha-1-acid glycoprotein 2                          | 0.976 | 0.810 | 1.134 | 0.037 |
| P22792     | Carboxypeptidase N subunit 2                         | 1.147 | 0.068 | 1.083 | 0.044 |
| P25311     | Zinc-alpha-2-glycoprotein                            | 0.970 | 0.844 | 1.283 | 0.006 |
| P55058     | Phospholipid transfer protein                        | 1.390 | 0.056 | 1.232 | 0.026 |
| Q03591     | Complement factor H-related protein 1                | 1.426 | 0.050 | 1.474 | 0.003 |
| P12259     | Coagulation factor V                                 | 1.419 | 0.049 | 1.149 | 0.117 |
| P01857     | Ig gamma-1 chain C region                            | 0.689 | 0.002 | 0.872 | 0.985 |
| P01859     | Ig gamma-2 chain C region                            | 0.604 | 0.001 | 0.861 | 0.967 |
| E9PHK0     | Tetranectin                                          | 0.858 | 0.031 | 0.944 | 0.936 |
| O95445     | Apolipoprotein M                                     | 0.813 | 0.027 | 0.974 | 0.687 |
| P00748     | Coagulation factor XII                               | 0.791 | 0.007 | 0.828 | 1.000 |
| P01834     | Ig kappa chain C region                              | 0.838 | 0.022 | 1.036 | 0.214 |
| P02652     | Apolipoprotein A-II                                  | 1.165 | 0.035 | 0.956 | 0.815 |
| P04003     | C4b-binding protein alpha chain                      | 0.764 | 0.022 | 0.805 | 1.000 |
| P06681     | Complement C2                                        | 0.812 | 0.029 | 0.970 | 0.784 |
| P08603     | Complement factor H                                  | 0.872 | 0.049 | 0.860 | 1.000 |
| P09871     | Complement C1s subcomponent                          | 0.881 | 0.016 | 0.983 | 0.702 |
| P13671     | Complement component C6                              | 0.869 | 0.017 | 0.974 | 0.763 |
| P80108     | Phosphatidylinositol-glycan-specific phospholipase D | 1.357 | 0.003 | 1.106 | 0.100 |
| Q06033     | Inter-alpha-trypsin inhibitor heavy chain H3         | 0.802 | 0.033 | 0.967 | 0.676 |
| Q96PD5     | N-acetylmuramoyl-L-alanine amidase                   | 0.829 | 0.038 | 1.069 | 0.086 |
| P80748     | Ig lambda chain V-III region LOI                     | 0.477 | 0.264 | 1.549 | 0.050 |
| P02749     | Beta-2-glycoprotein 1                                | 0.554 | 0.000 | 0.732 | 1.000 |
| Q16610     | Extracellular matrix protein 1                       | 0.453 | 0.029 | 0.624 | 0.995 |

**Supplementary table S3. Quantitative analysis of proteins differentially expressed in CACs incubated with serum samples of asymptomatic donors (vs Neg).** The table includes (from left to right): Protein IDs (Uniprot accession number), protein description, PCR+/Neg ratio, PCR+/Neg p-value, IgG+/Neg ratio and IgG+/Neg p-value. Over-expressed values are indicated in red (considering up-regulated ratio > 1.5) and under-expressed values in green (down-regulated ratio < 0.6). The table shows the significant values for at least one of the comparisons. (considering P-value < 0.05 as differentially significant)

| Protein IDs | Protein names                                                    | Ratio<br>PCRvsNeg | p-value | Ratio<br>IgGvsNeg | p-value |
|-------------|------------------------------------------------------------------|-------------------|---------|-------------------|---------|
| P08590      | Myosin light chain 3                                             | 3.188             | 0.026   | 3.300             | 0.023   |
| P06730      | Eukaryotic translation initiation factor 4E                      | 100               | 0.150   | 100               | 0.026   |
| P50281      | Matrix metalloproteinase-14                                      | 100               | 0.007   | 100               | 0.334   |
| Q15042      | Rab3 GTPase-activating protein catalytic subunit                 | 100               | 0.004   | 100               | 0.334   |
| A0A1W2PR11  | HLA class I histocompatibility antigen, C alpha chain            | 1.916             | 0.038   | 1.714             | 0.100   |
| Q14152      | Eukaryotic translation initiation factor 3 subunit A             | 4.229             | 0.050   | 2.641             | 0.280   |
| A0A0G2JQ10  | Leukocyte immunoglobulin-like receptor subfamily B member 4      | 100               | 0.008   | 1.000             | 1.000   |
| P16070      | CD44 antigen                                                     | 1.568             | 0.024   | 1.048             | 0.681   |
| O43684      | Mitotic checkpoint protein BUB3                                  | 4.245             | 0.015   | 1.273             | 0.801   |
| O60603      | Toll-like receptor 2                                             | 17.821            | 0.003   | 1.087             | 0.954   |
| P05362      | Intercellular adhesion molecule 1                                | 5.924             | 0.008   | 1.491             | 0.590   |
| P15104      | Glutamine synthetase                                             | 2.207             | 0.001   | 1.121             | 0.179   |
| P33121      | Long-chain-fatty-acid--CoA ligase 1                              | 1.708             | 0.011   | 1.094             | 0.078   |
| P62857      | 40S ribosomal protein S28                                        | 1.596             | 0.008   | 1.104             | 0.592   |
| Q13501      | Sequestosome-1                                                   | 2.762             | 0.027   | 1.085             | 0.876   |
| Q92597      | Protein NDRG1                                                    | 2.636             | 0.038   | 1.102             | 0.808   |
| Q9H939      | Proline-serine-threonine phosphatase-interacting protein 2       | 100               | 0.011   | 1.000             | 1.000   |
| P35241      | Radixin                                                          | 2.420             | 0.044   | 1.061             | 0.885   |
| Q9NSI8      | SAM domain-containing protein SAMSN-1                            | 8.223             | 0.019   | 0.000             | 0.155   |
| Q9C002      | Normal mucosa of esophagus-specific gene 1 protein               | 7.460             | 0.015   | 0.000             | 0.149   |
| E9PL57      | NEDD8                                                            | 1.363             | 0.383   | 1.909             | 0.038   |
| P59998      | Actin-related protein 2/3 complex subunit 4                      | 0.655             | 0.000   | 0.739             | 0.000   |
| P11021      | 78 kDa glucose-regulated protein                                 | 1.422             | 0.000   | 1.251             | 0.017   |
| P14314      | Glucosidase 2 subunit beta                                       | 1.296             | 0.001   | 1.200             | 0.036   |
| O15127      | Secretory carrier-associated membrane protein 2                  | 1.278             | 0.003   | 1.264             | 0.035   |
| P12236      | ADP/ATP translocase 3                                            | 0.801             | 0.022   | 0.771             | 0.007   |
| P13667      | Protein disulfide-isomerase A4                                   | 1.304             | 0.004   | 1.204             | 0.039   |
| P14866      | Heterogeneous nuclear ribonucleoprotein L                        | 0.694             | 0.008   | 0.758             | 0.025   |
| P19338      | Nucleolin                                                        | 0.744             | 0.023   | 0.661             | 0.002   |
| P20340      | Ras-related protein Rab-6A                                       | 1.171             | 0.023   | 1.323             | 0.048   |
| P23141      | Liver carboxylesterase 1                                         | 1.225             | 0.018   | 1.169             | 0.047   |
| P23246      | Splicing factor, proline- and glutamine-rich                     | 1.189             | 0.016   | 1.207             | 0.001   |
| P23528      | Cofilin-1                                                        | 0.854             | 0.008   | 0.865             | 0.011   |
| P49755      | Transmembrane emp24 domain-containing protein 10                 | 1.293             | 0.005   | 1.220             | 0.016   |
| P62879      | Guanine nucleotide-binding protein G(I)/G(S)/G(T) subunit beta-2 | 0.626             | 0.044   | 0.698             | 0.022   |
| P63220      | 40S ribosomal protein S21                                        | 1.394             | 0.004   | 1.306             | 0.014   |
| Q00325      | Phosphate carrier protein, mitochondrial                         | 0.673             | 0.020   | 0.669             | 0.049   |
| Q15084      | Protein disulfide-isomerase A6                                   | 1.241             | 0.010   | 1.223             | 0.024   |

|            |                                                                            |       |       |       |       |
|------------|----------------------------------------------------------------------------|-------|-------|-------|-------|
| Q99536     | Synaptic vesicle membrane protein VAT-1 homolog                            | 0.740 | 0.005 | 0.791 | 0.028 |
| P13639     | Elongation factor 2                                                        | 0.930 | 0.371 | 0.782 | 0.009 |
| P29966     | Myristoylated alanine-rich C-kinase substrate                              | 0.988 | 0.952 | 0.645 | 0.045 |
| P62979     | Ubiquitin-40S ribosomal protein S27a                                       | 0.896 | 0.339 | 0.676 | 0.005 |
| P52272     | Heterogeneous nuclear ribonucleoprotein M                                  | 0.796 | 0.068 | 0.683 | 0.008 |
| P01903     | HLA class II histocompatibility antigen, DR alpha chain                    | 0.869 | 0.066 | 0.841 | 0.012 |
| P04439     | HLA class I histocompatibility antigen, A-3 alpha chain                    | 1.357 | 0.062 | 1.266 | 0.044 |
| P02545     | Prelamin-A/C                                                               | 1.111 | 0.074 | 1.158 | 0.013 |
| J3KN67     | Tropomyosin alpha-3 chain                                                  | 0.853 | 0.108 | 0.793 | 0.000 |
| O00182     | Galectin-9                                                                 | 1.031 | 0.879 | 1.258 | 0.036 |
| P04406     | Glyceraldehyde-3-phosphate dehydrogenase                                   | 0.904 | 0.171 | 0.850 | 0.033 |
| P28062     | Proteasome subunit beta type-8                                             | 0.862 | 0.412 | 0.652 | 0.038 |
| P60174     | Triosephosphate isomerase                                                  | 1.423 | 0.069 | 1.354 | 0.029 |
| P62993     | Growth factor receptor-bound protein 2                                     | 1.098 | 0.420 | 1.215 | 0.047 |
| P63104     | 14-3-3 protein zeta/delta                                                  | 0.937 | 0.086 | 0.872 | 0.000 |
| P63241     | Eukaryotic translation initiation factor 5A-1                              | 0.862 | 0.250 | 0.691 | 0.002 |
| P68363     | Tubulin alpha-1B chain                                                     | 0.888 | 0.069 | 0.843 | 0.011 |
| P08865     | 40S ribosomal protein SA                                                   | 1.274 | 0.044 | 0.992 | 0.923 |
| P06454     | Prothymosin alpha                                                          | 1.164 | 0.031 | 0.986 | 0.823 |
| O60763     | General vesicular transport factor p115                                    | 1.391 | 0.023 | 1.068 | 0.549 |
| P05387     | 60S acidic ribosomal protein P2                                            | 1.221 | 0.020 | 1.058 | 0.360 |
| P13686     | Tartrate-resistant acid phosphatase type 5                                 | 0.760 | 0.030 | 1.082 | 0.482 |
| P13693     | Translationally-controlled tumor protein                                   | 1.211 | 0.015 | 0.928 | 0.400 |
| P21333     | Filamin-A                                                                  | 1.186 | 0.004 | 1.086 | 0.098 |
| P25398     | 40S ribosomal protein S12                                                  | 1.179 | 0.031 | 1.025 | 0.732 |
| P29350     | Tyrosine-protein phosphatase non-receptor type 6                           | 0.755 | 0.006 | 0.988 | 0.878 |
| P51148     | Ras-related protein Rab-5C                                                 | 0.858 | 0.030 | 0.952 | 0.418 |
| P61026     | Ras-related protein Rab-10                                                 | 1.430 | 0.000 | 1.181 | 0.118 |
| Q9HCN8     | Stromal cell-derived factor 2-like protein 1                               | 1.457 | 0.002 | 1.026 | 0.878 |
| P25786     | Proteasome subunit alpha type-1                                            | 1.220 | 0.005 | 1.301 | 0.054 |
| A0A494C0X7 | Integrin beta-2                                                            | 0.829 | 0.032 | 0.912 | 0.191 |
| O75390     | Citrate synthase, mitochondrial                                            | 0.766 | 0.004 | 0.911 | 0.368 |
| O75347     | Tubulin-specific chaperone A                                               | 1.309 | 0.003 | 1.079 | 0.543 |
| E9PAV3     | Nascent polypeptide-associated complex subunit alpha, muscle-specific form | 1.229 | 0.042 | 1.040 | 0.605 |
| O15143     | Actin-related protein 2/3 complex subunit 1B                               | 1.123 | 0.018 | 1.089 | 0.145 |
| P06744     | Glucose-6-phosphate isomerase                                              | 1.233 | 0.007 | 1.139 | 0.095 |
| P07602     | Prosaposin                                                                 | 0.628 | 0.031 | 0.856 | 0.283 |
| P07711     | Cathepsin L1                                                               | 1.442 | 0.036 | 1.169 | 0.302 |
| P09496     | Clathrin light chain A                                                     | 1.131 | 0.049 | 0.993 | 0.931 |
| P11940     | Polyadenylate-binding protein 1                                            | 1.351 | 0.027 | 1.140 | 0.075 |
| P12956     | X-ray repair cross-complementing protein 6                                 | 0.607 | 0.024 | 0.797 | 0.292 |
| P14625     | Endoplasmin                                                                | 1.173 | 0.029 | 1.083 | 0.328 |
| P17050     | Alpha-N-acetylgalactosaminidase                                            | 0.782 | 0.023 | 0.869 | 0.094 |
| P23526     | Adenosylhomocysteinase                                                     | 1.161 | 0.049 | 1.100 | 0.215 |
| P27105     | Erythrocyte band 7 integral membrane protein                               | 1.380 | 0.029 | 1.165 | 0.250 |
| P30040     | Endoplasmic reticulum resident protein 29                                  | 1.336 | 0.009 | 1.171 | 0.126 |

|        |                                                                |       |       |       |       |
|--------|----------------------------------------------------------------|-------|-------|-------|-------|
| P30101 | Protein disulfide-isomerase A3                                 | 1.153 | 0.006 | 1.110 | 0.138 |
| P42785 | Lysosomal Pro-X carboxypeptidase                               | 0.717 | 0.042 | 0.743 | 0.121 |
| P46940 | Ras GTPase-activating-like protein IQGAP1                      | 0.605 | 0.013 | 0.805 | 0.277 |
| P49748 | Very long-chain specific acyl-CoA dehydrogenase, mitochondrial | 1.373 | 0.040 | 1.170 | 0.445 |
| P53634 | Dipeptidyl peptidase 1                                         | 0.810 | 0.016 | 0.872 | 0.075 |
| P60709 | Actin, cytoplasmic 1                                           | 1.418 | 0.021 | 1.241 | 0.203 |
| P61586 | Transforming protein RhoA                                      | 1.161 | 0.018 | 1.077 | 0.290 |
| P67936 | Tropomyosin alpha-4 chain                                      | 1.334 | 0.020 | 1.194 | 0.061 |
| Q16719 | Kynureninase                                                   | 1.256 | 0.031 | 1.086 | 0.137 |
| Q5Y7D1 | HLA class II histocompatibility antigen DR beta chain          | 0.874 | 0.028 | 0.959 | 0.604 |
| Q7KZF4 | Staphylococcal nuclease domain-containing protein 1            | 0.684 | 0.045 | 0.878 | 0.374 |
| Q9H299 | SH3 domain-binding glutamic acid-rich-like protein 3           | 1.110 | 0.022 | 1.014 | 0.850 |
| Q9UJU6 | Drebrin-like protein                                           | 1.109 | 0.034 | 1.061 | 0.230 |
| Q9Y6N5 | Sulfide:quinone oxidoreductase, mitochondrial                  | 1.351 | 0.033 | 1.150 | 0.163 |
| Q9Y678 | Coatmer subunit gamma-1                                        | 1.061 | 0.831 | 0.460 | 0.039 |
| Q96FW1 | Ubiquitin thioesterase OTUB1                                   | 0.625 | 0.102 | 0.512 | 0.025 |
| P46782 | 40S ribosomal protein S5                                       | 0.657 | 0.146 | 0.535 | 0.029 |
| P11908 | Ribose-phosphate pyrophosphokinase 2                           | 0.841 | 0.655 | 0.293 | 0.039 |
| P21291 | Cysteine and glycine-rich protein 1                            | 0.784 | 0.209 | 0.591 | 0.009 |
| P84077 | ADP-ribosylation factor 1                                      | 0.745 | 0.140 | 0.562 | 0.010 |
| Q09028 | Histone-binding protein RBBP4                                  | 0.807 | 0.634 | 0.220 | 0.019 |
| Q13200 | 26S proteasome non-ATPase regulatory subunit 2                 | 0.739 | 0.283 | 0.556 | 0.041 |
| P19105 | Myosin regulatory light chain 12A                              | 0.591 | 0.001 | 0.643 | 0.001 |
| Q9NQC3 | Reticulon-4                                                    | 0.420 | 0.002 | 0.638 | 0.006 |
| P62917 | 60S ribosomal protein L8                                       | 0.000 | 0.032 | 1.189 | 0.779 |
| P07305 | Histone H1.0                                                   | 0.241 | 0.029 | 0.939 | 0.872 |
| P41218 | Myeloid cell nuclear differentiation antigen                   | 0.565 | 0.002 | 1.002 | 0.986 |
| P63167 | Dynein light chain 1, cytoplasmic                              | 0.564 | 0.041 | 1.042 | 0.780 |
| Q13576 | Ras GTPase-activating-like protein IQGAP2                      | 0.444 | 0.047 | 0.734 | 0.322 |
| Q86V81 | THO complex subunit 4                                          | 0.317 | 0.033 | 1.073 | 0.854 |
| Q9NY15 | Stabilin-1                                                     | 0.347 | 0.001 | 0.800 | 0.250 |
| Q9Y2S2 | Lambda-crystallin homolog                                      | 0.218 | 0.000 | 0.931 | 0.697 |
| Q15185 | Prostaglandin E synthase 3                                     | 0.463 | 0.043 | 0.914 | 0.693 |
| Q01844 | RNA-binding protein EWS                                        | 0.459 | 0.044 | 0.696 | 0.265 |
| O00160 | Unconventional myosin-I $\epsilon$                             | 0.280 | 0.033 | 0.659 | 0.313 |
| P56537 | Eukaryotic translation initiation factor 6                     | 0.000 | 0.022 | 0.682 | 0.599 |
| P62244 | 40S ribosomal protein S15a                                     | 0.380 | 0.003 | 0.729 | 0.247 |
| P62834 | Ras-related protein Rap-1A                                     | 0.517 | 0.003 | 0.677 | 0.073 |
| P38571 | Lysosomal acid lipase/cholesteryl ester hydrolase              | 0.220 | 0.016 | 0.344 | 0.036 |
| P62266 | 40S ribosomal protein S23                                      | 0.000 | 0.032 | 0.032 | 0.038 |
| P62308 | Small nuclear ribonucleoprotein G                              | 0.000 | 0.006 | 0.000 | 0.006 |
| P11233 | Ras-related protein Ral-A                                      | 0.046 | 0.028 | 0.000 | 0.021 |
| Q96EP5 | DAZ-associated protein 1                                       | 0.392 | 0.025 | 0.283 | 0.008 |
| O14880 | Microsomal glutathione S-transferase 3                         | 0.059 | 0.001 | 0.204 | 0.006 |
| O43598 | 2-deoxynucleoside 5-phosphate N-hydrolase 1                    | 0.000 | 0.008 | 0.000 | 0.008 |
| P14854 | Cytochrome c oxidase subunit 6B1                               | 0.218 | 0.001 | 0.405 | 0.009 |

|        |                                                                         |       |       |       |       |
|--------|-------------------------------------------------------------------------|-------|-------|-------|-------|
| P17655 | Calpain-2 catalytic subunit                                             | 0.468 | 0.020 | 0.389 | 0.008 |
| P32969 | 60S ribosomal protein L9                                                | 0.032 | 0.000 | 0.032 | 0.000 |
| P55084 | Trifunctional enzyme subunit beta, mitochondrial                        | 0.403 | 0.002 | 0.509 | 0.003 |
| P67775 | Serine/threonine-protein phosphatase 2A catalytic subunit alpha isoform | 0.357 | 0.029 | 0.344 | 0.032 |
| P68431 | Histone H3.1                                                            | 0.000 | 0.049 | 0.000 | 0.049 |
| Q6FI13 | Histone H2A type 2-A                                                    | 0.000 | 0.005 | 0.118 | 0.013 |
| Q9UHD8 | Septin-9                                                                | 0.515 | 0.003 | 0.429 | 0.001 |
| P13010 | X-ray repair cross-complementing protein 5                              | 0.489 | 0.057 | 0.399 | 0.027 |
| Q96D96 | Voltage-gated hydrogen channel 1                                        | 0.442 | 0.059 | 0.415 | 0.046 |
| P46063 | ATP-dependent DNA helicase Q1                                           | 0.371 | 0.063 | 0.295 | 0.027 |
| Q08211 | ATP-dependent RNA helicase A                                            | 0.485 | 0.139 | 0.224 | 0.024 |
| Q86U42 | Polyadenylate-binding protein 2                                         | 0.456 | 0.287 | 0.000 | 0.022 |
| Q9HB90 | Ras-related GTP-binding protein C                                       | 0.395 | 0.238 | 0.000 | 0.030 |
| Q9Y6W5 | Wiskott-Aldrich syndrome protein family member 2                        | 0.558 | 0.096 | 0.459 | 0.026 |
| O95881 | Thioredoxin domain-containing protein 12                                | 0.471 | 0.047 | 0.481 | 0.056 |
| P02751 | Fibronectin                                                             | 0.000 | 0.033 | 0.543 | 0.421 |
| P05386 | 60S acidic ribosomal protein P1                                         | 0.339 | 0.014 | 0.550 | 0.118 |
| Q71UI9 | Histone H2A.V                                                           | 0.136 | 0.001 | 0.506 | 0.075 |
| P14598 | Neutrophil cytosol factor 1                                             | 0.335 | 0.041 | 0.385 | 0.066 |
| P32119 | Peroxisiredoxin-2                                                       | 0.145 | 0.024 | 0.274 | 0.081 |

**Supplementary table S4. Proteins highlighted by Naïve Bayes (NB) model for classifying CACs incubated with serum samples of asymptomatic donors (PCR+, IgG+ and Negative).** The analysis test mode used 5-fold cross-validation. The table includes (from left to right): Protein IDs (Uniprot accession number), gen name and protein description.

| Protein IDs | Gen name | Name                                               |
|-------------|----------|----------------------------------------------------|
| P17050      | NAGA     | Alpha-N-acetylgalactosaminidase                    |
| P15104      | GLUL     | Glutamine synthetase                               |
| O14880      | MGST3    | Microsomal glutathione S-transferase 3             |
| P41218      | MNDA     | Myeloid cell nuclear differentiation antigen       |
| P25786      | PSMA1    | Proteasome subunit alpha type-1                    |
| P59998      | ARPC4    | Actin-related protein 2/3 complex subunit 4        |
| P55084      | HADHB    | Trifunctional enzyme subunit beta, mitochondrial   |
| P11021      | HSPA5    | 78 kDa glucose-regulated protein                   |
| P33121      | ACSL1    | Long-chain-fatty-acid--CoA ligase 1                |
| J3KN67      | TPM3     | Tropomyosin alpha-3 chain                          |
| P09496      | CLTA     | Clathrin light chain A                             |
| P38571      | LIPA     | Lysosomal acid lipase/cholesteryl ester hydrolase  |
| P62857      | RPS28    | 40S ribosomal protein S28                          |
| Q9NQC3      | RTN4     | Reticulon-4                                        |
| P13639      | EEF2     | Elongation factor 2                                |
| Q9NSI8      | SAMSN1   | SAM domain-containing protein SAMSN-1              |
| O15127      | SCAMP2   | Secretory carrier-associated membrane protein 2    |
| P19105      | MYL12A   | Myosin regulatory light chain 12A                  |
| Q9Y6N5      | SQOR     | Sulfide:quinone oxidoreductase, mitochondrial      |
| Q9C002      | NMES1    | Normal mucosa of esophagus-specific gene 1 protein |

**Supplementary table S5. Proteins highlighted by support vector machines (SVM) model for classifying CACs incubated with serum samples of asymptomatic donors (PCR+, IgG+ and Negative).** The analysis test mode used 5-fold cross-validation. The table includes (from left to right): Protein IDs (Uniprot accession number), gen name and protein description.

| Protein IDs | Gen name | Name                                                           |
|-------------|----------|----------------------------------------------------------------|
| Q71UI9      | H2AZ2    | Histone H2A.V                                                  |
| P32969      | RPL9     | 60S ribosomal protein L9                                       |
| Q9Y277      | VDAC3    | Voltage-dependent anion-selective channel protein 3            |
| P14854      | COX6B1   | Cytochrome c oxidase subunit 6B1                               |
| O14672      | ADAM10   | Disintegrin and metalloproteinase domain-containing protein 10 |
| P11233      | RALA     | Ras-related protein Ral-A                                      |
| P62308      | SNRPG    | Small nuclear ribonucleoprotein G                              |
| O14880      | MGST3    | Microsomal glutathione S-transferase 3                         |
| Q9Y2S2      | CRYL1    | Lambda-crystallin homolog                                      |
| P21980      | TGM2     | Protein-glutamine gamma-glutamyltransferase 2                  |
| Q6FI13      | H2AC18/9 | Histone H2A type 2-A                                           |
| A0A0G2JQ10  | LILRB4   | Leukocyte immunoglobulin-like receptor subfamily B member 4    |
| Q9UBS4      | DNAJB11  | DnaJ homolog subfamily B member 11 precursor                   |
| Q9H939      | PSTPIP2  | Proline-serine-threonine phosphatase-interacting protein 2     |
| Q9NPJ3      | ACOT13   | Acyl-coenzyme A thioesterase 13                                |
| O60603      | TLR2     | Toll-like receptor 2                                           |
| P62917      | RPL8     | 60S ribosomal protein L8                                       |
| Q6P4A8      | PLBD1    | Phospholipase B-like 1 precursor                               |
| Q9BZZ5      | API5     | Apoptosis inhibitor 5                                          |
| P50281      | MMP14    | Matrix metalloproteinase-14                                    |

**Supplementary table S6. Proteins highlighted by Random Forest model for classifying CACs incubated with serum samples of asymptomatic donors (PCR+, IgG+ and Negative).** The analysis test mode used 5-fold cross-validation. The table includes (from left to right): Protein IDs (Uniprot accession number), gen name and protein description.

| Protein IDs | Gen name | Name                                                 |
|-------------|----------|------------------------------------------------------|
| P62424      | RPL7A    | 60S ribosomal protein L7a                            |
| P17050      | NAGA     | Alpha-N-acetylgalactosaminidase                      |
| P54727      | RAD23B   | UV excision repair protein RAD23 homolog B           |
| P13693      | TPT1     | Translationally-controlled tumor protein             |
| P08631      | HCK      | Tyrosine-protein kinase HCK                          |
| P41218      | MNDA     | Myeloid cell nuclear differentiation antigen         |
| Q9NY15      | STAB1    | Stabilin-1                                           |
| P84077      | ARF1     | ADP-ribosylation factor 1                            |
| P61586      | RHOA     | Transforming protein RhoA                            |
| Q15008      | PSMD6    | 26S proteasome non-ATPase regulatory subunit 6       |
| Q9H299      | SH3BGRL3 | SH3 domain-binding glutamic acid-rich-like protein 3 |
| P11279      | LAMP1    | Lysosome-associated membrane glycoprotein 1          |
| P12236      | SLC25A6  | ADP/ATP translocase 3                                |
| O75369      | FLNB     | Filamin-B                                            |
| Q92597      | NDRG1    | Protein NDRG1                                        |

|        |        |                                  |
|--------|--------|----------------------------------|
| P41567 | EIF1   |                                  |
| P18621 | RPL17  |                                  |
| P53634 | CTSC   | Dipeptidyl peptidase 1           |
| P14854 | COX6B1 | Cytochrome c oxidase subunit 6B1 |
| P40939 | HADHA  |                                  |
